# RFQAmodeL: Random Forest Quality Assessment to identify a predicted protein structure in the correct fold.

Clare E. West<sup>1</sup>, Saulo H. P. de Oliveira<sup>2,3</sup>, Charlotte M. Deane<sup>1\*</sup>

**1** Department of Statistics, University of Oxford, Oxford, United Kingdom

**2** SLAC National Accelerator Laboratory, Stanford University, Menlo Park, USA

**3** Bioengineering, Stanford University, Stanford, USA

\* [deane@stats.ox.ac.uk](mailto:deane@stats.ox.ac.uk)

## Abstract

While template-free protein structure prediction protocols now produce good quality models for many targets, modelling failure remains common. For these methods to be useful it is important that users can both choose the best model from the hundreds to thousands of models that are commonly generated for a target, and determine whether this model is likely to be correct. We have developed Random Forest Quality Assessment (RFQAmodeL), which assesses whether models produced by a protein structure prediction pipeline have the correct fold. RFQAmodeL uses a combination of existing quality assessment scores with two predicted contact map alignment scores. These alignment scores are able to identify correct models for targets that are not otherwise captured. Our classifier was trained on a large set of protein domains that are structurally diverse and evenly balanced in terms of protein features known to have an effect on modelling success, and then tested on a second set of 244 protein domains with a similar spread of properties. When models for each target in this second set were ranked according to the RFQAmodeL score, the highest-ranking model had a high-confidence RFQAmodeL score for 67 modelling targets, of which 52 had the correct fold. At the other end of the scale RFQAmodeL correctly predicted that for 59 targets the highest-ranked model was incorrect. In comparisons to other methods we found that

RFQAmode is better able to identify correct models for targets where only a few of the models are correct. We found that RFQAmode achieved a similar performance on the model sets for CASP12 and CASP13 free-modelling targets. Finally, by iteratively generating models and running RFQAmode until a model is produced that is predicted to be correct with high confidence, we demonstrate how such a protocol can be used to focus computational efforts on difficult modelling targets.

## Introduction

Template-free protein structure prediction protocols routinely produce hundreds to thousands of models for a given target [1]. Users need to be able to identify if a good model exists in this ensemble. The final step in a typical structure prediction pipeline is therefore to select a representative subset of five or fewer models as output [2]. This model selection step is critical, and the community's ability to select good models is assessed as part of the Critical Assessment of protein Structure Prediction (CASP) experiments [3].

Protocols for model quality assessment can be divided into three classes: single-model methods, quasi-single model methods, and consensus methods [2]. Single-model methods calculate a score for each model independently, and this score does not take into account any of the other models generated for a particular target. The objective function optimised during protein structure prediction can usually be used as a single-model quality estimator, but better results have been reported if different scores are used for modelling and ranking [2]. Examples of single-model scores include ProQ3D [4] and the ROSETTA energy terms [5]. For quasi-single model methods, the score of a given model is calculated based on its relative score compared to a subset of all models (reference set) produced for the target, for example MQAPsingle [6]. Consensus methods, such as Pcons [7], perform pairwise comparison of the predicted structures to identify clusters of similar models or regions, and assume that structures with high consensus are more likely to be correct.

Predicted contacts derived from co-evolution analysis of multiple sequence alignments have been used as single or quasi-single model methods to improve model quality assessment (e.g. [7,8]). Existing contact-based methods for quality assessment

often consider the proportion of predicted contacts that are satisfied in each model (i.e. 25  
how many of the pairs of residues predicted to be in contact are within a certain 26  
threshold distance) [7]. ModFOLD6, a quasi-single model quality assessment method, 27  
includes a term describing the local agreement with predicted contacts for each residue 28  
in the model [9]. An alternative way to use predicted contact information is to align 29  
predicted contact maps for a particular target to the observed contacts maps of models. 30  
Contact map alignment has been used to select regions of models to be hybridised [10] 31  
or to perform protein threading [11]. Until now, contact map alignment has not been 32  
used for model quality assessment, but the principles that govern these techniques 33  
should also be applicable for quality assessment tasks. 34

In combination with recent advances in model quality due to better contact 35  
prediction techniques, improvements in model quality assessment have made 36  
template-free protein structure prediction more reliable (e.g. [7,8]). The most recent 37  
CASP competition demonstrated remarkable progress in the field: the 38  
highest-performing method produced a model in the correct fold (TM-score  $\geq 0.5$ ) in the 39  
top five models for 23 of 32 free-modelling target domains, although performance 40  
decreases when considering only the top model. This level of predictive ability has 41  
driven efforts to perform large-scale modelling of significant numbers of protein families 42  
without a member of known structure [10,12]. While these studies offer reliable 43  
topologies for many protein families, the recall of their quality assessment protocol 44  
remains low enough that some predictions with the correct topology may not be 45  
identified. Furthermore, such studies were limited by the computational expense of 46  
model generation, opting either to produce models for a subset of these families of 47  
unknown structure [10] or to produce a reduced number of models per target [12]. 48

In this paper, we introduce RFQAmode, a random forest quality assessment 49  
classifier developed to evaluate models produced by template-free protein structure 50  
prediction pipelines. The classifier combines existing quality assessment scores with 51  
predicted contact map alignment scores. Unlike most established quality assessment 52  
methods, RFQAmode is trained to evaluate whether models are in the correct fold 53  
(TM-score  $\geq 0.5$ ) rather than estimating the absolute model quality. For each model, 54  
RFQAmode outputs an estimated probability that the model is correct. This 55  
probability can be used to estimate whether the model is correct with high, medium, or 56

low confidence, or if modelling is predicted to have failed.

We compiled Training and Validation sets each comprising 244 structurally diverse protein domains. We ensured that these sets were well-balanced in terms of protein length, number of effective sequences [7], SCOP class [13], and other properties that are known to have an effect on modelling success. We used our sequential protein structure prediction protocol SAINT2 [1] to generate 500 models for each of the 488 protein domains. Using the Training set, we show that predicted contact map alignment scores are as effective for ranking models as existing state-of-the-art quality assessment scores. Furthermore, the models ranked highly by these contact map alignment scores are different from those ranked highly by conventional scores. We incorporate several state-of-the-art quality assessment scores alongside contact map alignment scores into a random forest classifier, RFQAmode, which classifies models as correct (i.e. in the correct topology) or incorrect, and outperforms the component quality assessment scores. Of the 244 targets in the Validation set, RFQAmode predicts that the highest-ranking model may be correct for 185 targets, of which 86 are correct (out of a possible 142 for which at least one correct model was generated by SAINT2). The 185 are further split by RFQAmode into those where the highest-ranking model is predicted to be correct with high confidence, 67 targets, of which 52 are correct. Of the 59 targets predicted to be modelling failures, 5 had at least one correct model, and none had a correct highest-ranking model. We demonstrate that similar results are achieved when applied to the server models submitted to CASP12 and CASP13. Finally, we demonstrate how RFQAmode can be used to estimate when sufficient models have been generated for a particular target, enabling more efficient use of computational power.

## Materials and methods

### Training and Validation Sets

To construct our Training and Validation data sets, we used the mapping between Pfam [14] domains and PDB [15] structures as available on the EBI repository in February 2017. To represent each of these families, we selected the first protein chain listed for that family (SI Table 1).

We annotated each of the protein chains according to the 2.06 stable build of SCOPe [13]. If the protein chain selected to represent a Pfam family was not annotated in SCOPe, we tested all the remaining members of the family sequentially (as ordered on the mapping) to maximise the number of Pfam families with SCOPe annotations (SI Table 2 and SI Fig 1).

We excluded all families longer than 250 residues, and performed a culling and cleaning process (SI Section 2) that resulted in a data set of 488 structurally diverse protein domains (SI Table 3). The average length and number of effective sequences,  $B_{\text{eff}}$ , as defined in [7] (see SI Section 3), of these domains were similar to those of the original PDB-mapped and SCOPe-annotated Pfam domain sets.

The 488 protein domains were divided into Training and Validation sets of equal size. For each SCOP class, we selected two domains at a time in order of increasing  $B_{\text{eff}}$  and randomly assigned one to the Training and the other to the Validation set. We used the  $B_{\text{eff}}$  of the multiple sequence alignments used for contact prediction. While this ensured that the sets have similar  $B_{\text{eff}}$  medians and have roughly the same number of protein domains for each SCOP class, the overall length and resolution distributions differed between sets (SI Fig 2). In particular, proteins in the Validation set with  $B_{\text{eff}} < 100$  tended to be longer than proteins on the Training set with  $B_{\text{eff}} < 100$ , which suggests that the Validation set may be more challenging for protein structure prediction.

## Protein Structure Prediction

To produce models for all targets in our Training and Validation sets, we used our fragment-assembly protocol SAINT2 [1] (for details, see SI Section 4 and [1]) with the parameters given in the original publication, with the exception of secondary structure prediction. We used DeepCNF Q8 to predict secondary structure, as DeepCNF Q8 had a slightly higher precision for targets with large  $B_{\text{eff}}$  values, and results in marginal improvements in fragments with predominantly loop secondary structure (see SI Section 4.1).

In order for SAINT2 to produce the best possible model, the optimal number of models to generate is 10,000 [1]. However, for the purpose of developing a quality assessment protocol, we estimated that only 500 models were required to produce

correct models for a sizeable number of targets (see SI Section 5). 116

We used SAINT2 to produce 500 models for each target in our Training and 117  
Validation sets. We assessed the number of modelling successes - targets for which at 118  
least one correct model (TM-score  $\geq 0.5$  [16]). was produced - as well as the TM-score 119  
of the best model produced for each target. 120

## CASP12 and CASP13 Test Sets 121

To test our classifier on models produced by methods other than SAINT2, and to 122  
compare its performance to other quality assessment methods, we used the stage2 server 123  
models used in the blind test of model quality assessment methods at CASP12 and 124  
CASP13. These consist of the 150 top-ranking server models submitted for 60 targets 125  
each for CASP12 and CASP13 targets. The models, model quality predictions, and 126  
model quality evaluations were accessed from the CASP website 127  
([http://www.predictioncenter.org/download\\_area/](http://www.predictioncenter.org/download_area/)). This resulted in a total of 17,976 128  
models for 120 targets. The lengths of the target structures range from 41 to 863 129  
residues, with an average length of 289 residues. 130

## Model Validation 131

To assess the quality of the models produced by SAINT2, we used TM-align to calculate 132  
TM-score [16]. We consider all models with a TM-score  $\geq 0.5$  to be in the correct 133  
topology [17]. 134

## Classification Features 135

For model classification, we used a set of 58 features, which can be divided into three 136  
groups: target-specific (3), model-specific (12), and ensemble-specific (43). The 137  
target-specific features are calculated from the target's sequence, and are common to all 138  
models produced for that target. The model-specific features are calculated for each 139  
model, and include five existing single-model quality assessment scores, a consensus 140  
method quality assessment score, two scores based on the predicted contacts, and three 141  
predicted contact map alignment scores. The ensemble-specific features are summary 142  
statistics (maximum, median, minimum, and spread) of our model-specific features 143

calculated across all models produced for each target. For all methods we used SAINT2 models and the predicted contacts generated by metaPSICOV. We note that many of the assessment scores used were not originally trained using these inputs, so their performance may be worse than expected.

**Target-specific features (3):** The domain length, the  $B_{\text{eff}}$ , and the total number of predicted contacts output by metaPSICOV with a score greater than 0.5.

**Single-model quality assessment scores (5):** The final modelling score output by SAINT2, and the global score output by ProQ3D and component scores ProQ2D, ProQRosFAD and ProQRosCenD [4]. ProQRosCenD and ProQRosFAD are based on the Rosetta centroid and full atom [5] energy functions, respectively, which were calculated on relaxed models with repacked side chains. Relaxation was carried out using the *ab initio* relax protocol of Rosetta 3.7 as described in [4]. For ranking models, we have additionally considered the SAINT2 score without its contact component (SAINT2 Raw); this was not included as a feature in the random forest classifier.

**Consensus quality assessment score (2):** We used the global score output by Pcons [18] with standard parameters. We also include PcombC [12], a weighted sum of three features: the ProQ3D global score, the Pcons consensus score, and the proportion of predicted contacts present in the model (positive predictive value, PPV).

**Contact-based features (2):** The contact component of the SAINT2 score (see [1] for more details) and the proportion of satisfied predicted contacts (positive predictive value, PPV). Here, we considered a predicted contact to be a satisfied if the C- $\beta$  atoms (C- $\alpha$  in the case of glycine) of the two residues predicted to be in contact were less than 8Å apart in the model output by SAINT2.

**Predicted contact map alignment scores (3):** We used BioPython [19] to calculate an observed contact map for each model, with an 8Å distance cut-off between residue C- $\beta$  atoms (C- $\alpha$  in case of glycine). We aligned the observed contact maps to the predicted contact maps produced from the output of metaPSICOV stage1. Two methods of contact map alignment were tested: map-align [10], and EigenTHREADER [11]. Map-align uses a dynamic programming algorithm to perform local contact map alignment and identify consensus regions. We used as features the best hit score and the best hit length produced by map-align. EigenTHREADER uses eigenvector decomposition and dynamic programming to align the principal eigenvectors

of the two maps. For an ensemble of structures, EigenTHREADER assesses which of the models is most likely to be in the same fold as the one described by the reference predicted contact map, assigning a relative score per model. We used the score output by EigenTHREADER for each model as a feature.

**Ensemble-specific features (43):** The maximum, minimum, median, and spread (the difference between the maximum and the median) of 10 of our 12 model-specific features, excluding map\_align’s hit length and the proportion and absolute number of satisfied predicted contacts, for which only the maximum value for each target is included. These features were calculated per target across all models.

## Results

### Modelling Results

Correct models were produced for 151 out of 244 protein domains in our Training set, and 145 out of 244 protein domains in our Validation set. This corresponds to around 60% of the targets in each set, in line with numbers reported previously [1].

When considering the modelling results according to three  $B_{\text{eff}}$  bins (SI Fig 7A), our results corroborate previous findings that modelling is more likely to succeed when more effective sequences are available [8]. We observe a modelling success rate of 46% for our Training set at  $B_{\text{eff}}$  values below 100, and a success rate of 69% for  $B_{\text{eff}} \geq 1000$ . Across our three  $B_{\text{eff}}$  bins (SI Fig 7A), we observe comparable modelling results for the Training and Validation sets, both in terms of the success rate and the distribution of the TM-scores of the best model for each target, with marginally worse performance for Validation set targets with  $B_{\text{eff}}$  values below 100.

We also find that modelling success rates vary by SCOP class (SI Fig 7B). For our Training set, SAINT2 produced a correct model for 85% of all- $\alpha$  targets, 65% of  $\alpha/\beta$  targets, 61% of  $\alpha+\beta$  targets, and 30% of all- $\beta$  targets. Comparable modelling success rates and distributions of TM-score of the best models were obtained for Training and Validation sets across all four SCOP classes.

Modelling success rates also depend on domain length (SI Fig 7C). We separated the targets in our Training and Validation sets into four domain length bins (50 to 99, 100



to 149, 150 to 199, 200 or more residues). As expected, modelling success rate decreases  
as targets increase in length. For our Training set, SAINT2 produced a correct model  
for 83% of the targets that were 50 to 99 residues-long, for 65% of targets that were 100  
to 149 residues-long, for 41% of targets that were 150 to 199 residues-long, and 39% of  
targets longer than 200 residues. When considering the combined effect of  $B_{\text{eff}}$  and  
domain length, SAINT2 failed to produce a correct model for all targets longer than 200  
residues with a  $B_{\text{eff}} < 100$  (see SI Fig 8).

Given the effect of these three features on modelling success, it is important to  
ensure that Training and Validation sets have similar distributions of domain length,  
effective sequences, and SCOP classes. A validation set that is comprised of shorter  
targets, or that contains more targets with a high  $B_{\text{eff}}$ , or a disproportionate number of  
 $\alpha$ -helical targets may lead to overestimation of classification performance.

## Comparing Quality Assessment methods

To assess the usefulness of including predicted contact map alignment scores as features  
for model quality assessment, we compared these scores with ten other model quality  
estimators: three SAINT2 scores and seven existing quality assessment scores. We  
ranked the 500 models produced by SAINT2 for each of the 244 targets in our Training  
set according to each of these model quality scores. For each score, we assessed the  
number of targets for which the highest-ranking model was correct (TM-score  $\geq 0.5$ ).  
Given that the quality of models is dependent on the availability of a sufficient number  
of effective sequences ( $B_{\text{eff}}$ ), we stratified this comparison across three  $B_{\text{eff}}$  bins (Fig 1).

We consider modelling to be a success if at least one correct model is produced for a  
target. For  $B_{\text{eff}} \geq 1,000$ , SAINT2 produced correct models for 86 out of 124 targets  
("Total Successes" in Fig 1). The two best methods for selecting correct models in this  
 $B_{\text{eff}}$  bin were the SAINT2 score and EigenTHREADER's predicted contact map score;  
the highest-ranking models of these methods were correct (TM-score  $\geq 0.5$ ) for 58 and  
57 targets, respectively. The predicted contact potential of the SAINT2 score,  
SAINT2\_Contact, also identified correct models for 57 targets, while only 38 were  
identified when this potential is excluded (SAINT2\_Raw). Within this  $B_{\text{eff}}$  bin, the  
length of the map.align predicted contact map alignment selected correct models for the



Of the targets correctly identified by EigenTHREADER, 12 are not identified using SAINT2, and 17 are not identified by PcombC (SI Fig 10A). Incorporating EigenTHREADER scores when ranking the models produced by SAINT2 may therefore improve our ability to identify correct models. While these three methods are the major contributors (SI Fig 10B), we included all 12 methods into our random forest classifier as all methods had some predictive power.

## RFQAmodel: model quality assessment

Among the Validation set of 244 targets, 142 have a correct model within the 500 models produced by SAINT2. Selecting the highest-ranking model according to the SAINT2 score results in a correct model for 86 targets in this set. However, as the SAINT2 score cannot easily be compared between targets, it is difficult to infer for which targets the highest-ranked models are correct. We have trained a classifier, RFQAmodel, that assesses each model produced for a target and outputs a score, between 0 and 1, that the model has the correct fold.

We assessed the performance of RFQAmodel on our Validation set. Using a Receiver Operating Characteristic (ROC) curve, RFQAmodel achieved an area under the curve (AUC) of 0.95 for classifying all models for all targets as correct or incorrect, higher than all the individual component scores, including the best individual quality assessment score, Pcons (0.91), EigenTHREADER (0.84), and the SAINT2 score (0.77), as well as the other quality assessment scores ProQ2D (0.90), ProQ3D (0.89), ProQRosFAD (0.88), and PcombC (0.79) (SI Fig 11). In practice, we are interested in the classification of the highest-ranked model per target as correct or incorrect; for this task, RFQAmodel also outperforms the component methods (Fig 2 and SI Fig 11B).

We divided the score output by RFQAmodel into four broad categories based on the Training set data: correct with high ( $>0.5$ ), medium (between 0.3 and 0.5), or low (between 0.1 and 0.3) confidence, or predicted modelling failures ( $\leq 0.1$ ) (SI Fig 12).

The models for a given target were ranked according to the RFQAmodel score, and targets were categorised based on the RFQAmodel score of the highest-ranking model. For each level of confidence, we assess whether the highest-ranking model (Top1) or the best of the top five highest-ranking models (Top5) is correct (Fig 3).

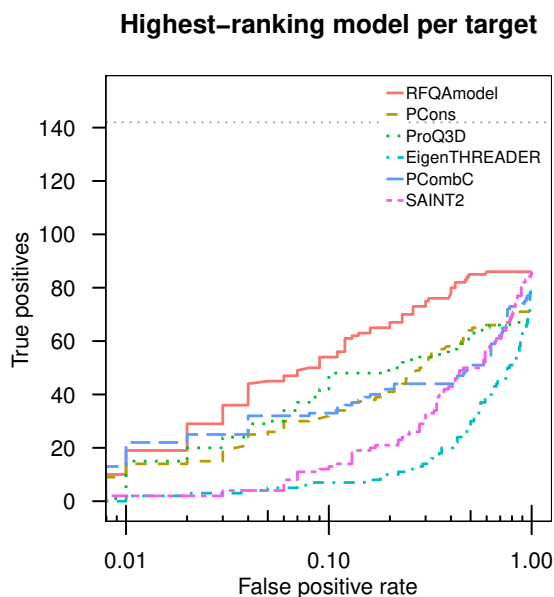

**Fig 2. Classification of Validation Set targets.**

The number of targets with a correct highest-ranking model (true positives, TM-score  $\geq 0.5$ ) plotted against the false positive rate on a logarithmic scale, for the 244 targets in our Validation set. Curves are shown for the six highest-performing methods in Fig 1; curves for all component methods are shown in SI Fig 11. The grey dotted line indicates the total number of targets that had at least one correct model.

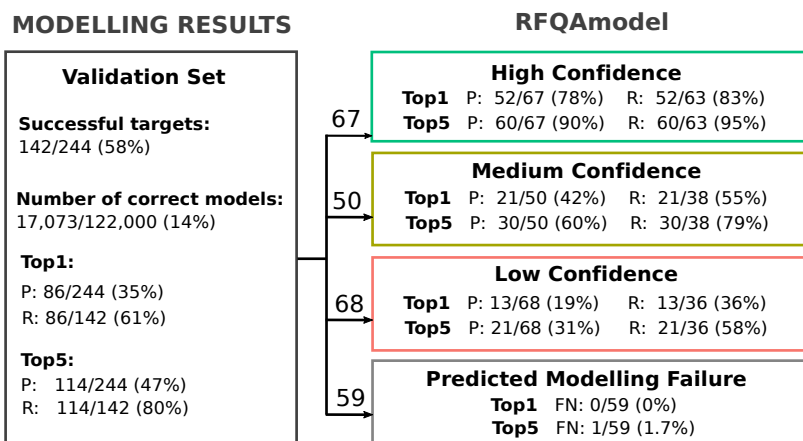

**Fig 3.** An overview of our classification protocol for the 244 modelling targets in our Validation set. The results of modelling (left, Section 3.2) and model quality assessment using RFQAmoel (right, Section 3.3) are shown. Modelling is considered successful for a given target if at least one model is correct (TM-score  $\geq 0.5$ ). For modelling results, models are ranked according to the SAINT2 score. For RFQAmoel results, models are ranked according to the RFQAmoel score. The precision (P) and recall (R) of the highest-ranked model (Top1) and the best of the top five highest-ranked models (Top5) are shown. For predicted modelling failures, the number of false negatives (FN) are shown.

When the models for each target in the Validation set are ranked according to the RFQAmode score, the highest-ranking (Top1) model is correct for 86 of 244 targets. This is exactly the same as the number of correct highest-ranking models when ranked according to SAINT2; the difference is that RFQAmode assigns a likelihood that each model is correct. RFQAmode predicts that modelling has failed ( $\leq 0.1$ ) for all models for 59 targets. For 5 of these targets there was at least one correct model in the 500, but the highest-ranked model was not correct for any. Excluding these 59 targets reduces our Validation set from 244 to 185 targets, of which 137 have a correct model.

The highest-ranking (Top1) model was predicted to be correct with low confidence for 68 targets. This model was correct for 13 of these targets (19% precision), and 21 targets had a correct model in the top five (Top5) highest-ranking models (31% precision).

The highest-ranking model was predicted to be correct with medium confidence for 50 targets. The highest-ranked model was correct for 21 of these targets (42% precision), and the best out of the top five highest-ranking models was correct for 30 targets (60% precision).

The highest-ranking model was predicted to be correct with high confidence for 67 targets. This model was correct for 52 out of these 67 high-confidence targets (78% precision), and the best out of the top five highest-ranking models was correct for 60 of these targets (90% precision).

When considering the combined results for the 117 targets with highest-ranking models predicted to be correct with high or medium confidence, this model was correct for 73 targets (62% precision), and the best out of the top five highest-ranking models was correct for 90 of these targets (77% precision).

## Comparison to methods used in large-scale studies

We compared RFQAmode to two methods that have been used to evaluate the success of large-scale predictions of unknown protein structures by Michel et al. [12] and Ovchinnikov et al. [10]. In the study by Michel et al., the authors used the PcombC score cut-off that achieved a false positive rate (FPR) of 0.01 and 0.1 on the benchmarking set to predict whether models were correct (TM-score  $\geq 0.5$ ) [12].

PcombC is one of the scores used in RFQAmode, so it is unsurprising that  
RFQAmode is able to achieve better performance (Fig 2). Compared to PcombC,  
RFQAmode performs similarly at an FPR of 0.01, but identifies a correct model for  
more targets at 0.1 (see Fig 2).

To compare RFQAmode with the method used in Ovchinnikov et al., we calculated  
the mean pairwise TM-score of the 10 models with the highest ProQ3RosCenD score  
out of the 500 models generated for each target, and classified targets above 0.65 as  
correct [10]. This method classified 21 targets as correct, of which 19 had a correct  
highest-ranking model. A similarly high precision was achieved using ProQ3RosFAD  
instead of ProQ3RosCenD (19 out of 22). Using RFQAmode, a similar precision with  
higher recall can be achieved with a cut-off of 0.7, with 26 of 29 targets having a correct  
highest-ranking model (Fig 4, solid lines). Using the high confidence cut-off for  
RFQAmode we achieve 78% precision and 37% recall. At this level of recall, the  
ProQ3RosCenD method achieves a precision of 36% (Fig 4, dashed lines). The difference  
between the methods appears to be the ability of RFQAmode to identify correctly  
modelled targets with fewer correct models (Fig 4).

## CASP12 and CASP13 Quality Assessment

RFQAmode was trained and validated on models generated using SAINT2. In order to  
test its performance on models generated by other methods, we used RFQAmode to  
classify models for the 57 CASP12 and 72 CASP13 Quality Assessment targets (see  
Methods). We used the stage2 set: the 150 highest-ranking models per target selected  
from the server predictions, with up to five models contributed by 93 different methods.  
The targets are not divided into constituent domains for the evaluation of quality  
assessment methods in CASP. As RFQAmode is designed to assess the output of  
template-free protein structure prediction protocols as correct or incorrect, here, we only  
evaluate its performance on the 33 CASP12 and 34 CASP13 targets containing domains  
classified as free-modelling targets. RFQAmode performs well on models of the easier  
template-based modelling targets, which tend to be globally more accurate (SI Table 4).

We used RFQAmode, trained on the SAINT2 Training set, to classify models in the  
CASP12 and CASP13 sets as either correct or incorrect. Of the 67 free-modelling

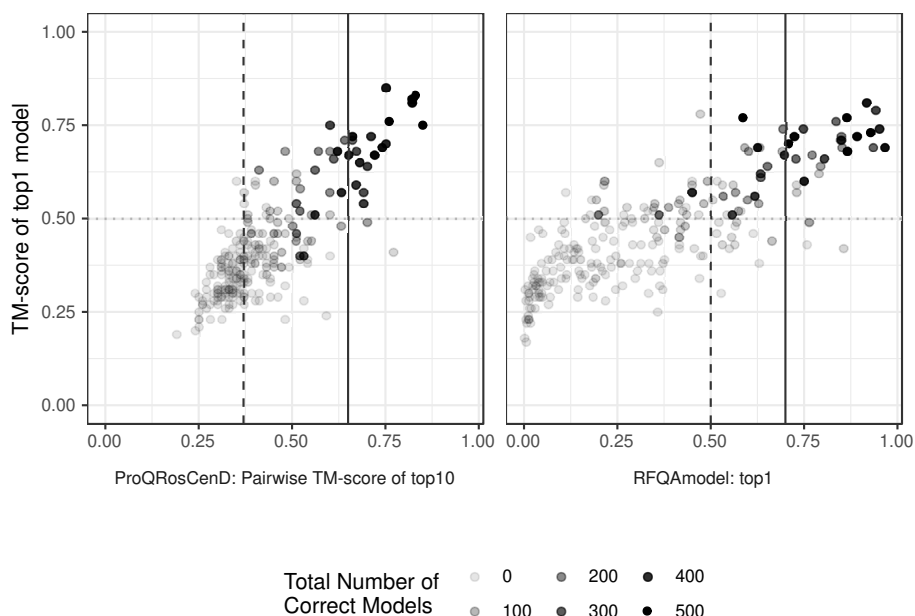

**Fig 4. Using convergence or RFQAmode to identify correct models.**

The TM-score of the highest-ranking model for each of the 244 targets in the Validation set according to ProQRosCenD and RFQAmode, against the mean pairwise TM-score of the 10 highest-ranking models (ProQRosCenD, left) or the score of the highest-ranking model (RFQAmode, right). Targets with a mean pairwise TM-score greater than 0.65 are predicted to be correct (solid line, left); a similar precision is achieved with an RFQAmode cut-off of 0.7 (solid line, right). A pairwise TM-score cut-off of 0.37 (dashed line, left) achieves a similar recall to the high confidence cut-off of RFQAmode (dashed line, right). Targets for which fewer correct models were generated among the 500 models are shown with lighter circles.

targets, 47 targets had at least one correct model. When classified using RFQAmode, 31 targets had a high confidence highest-ranking model, of which 21 were correct (68% precision, 31% recall).

To assess the performance against other quality assessment techniques, we compared RFQAmode to the predictions submitted to CASP13 for free-modelling targets. These blind predictions were submitted between May and July 2018, and made publically available in December 2018. We find that RFQAmode performs similarly to the top performing methods at classifying individual models and the highest-ranking model as correct or incorrect (Fig 5).

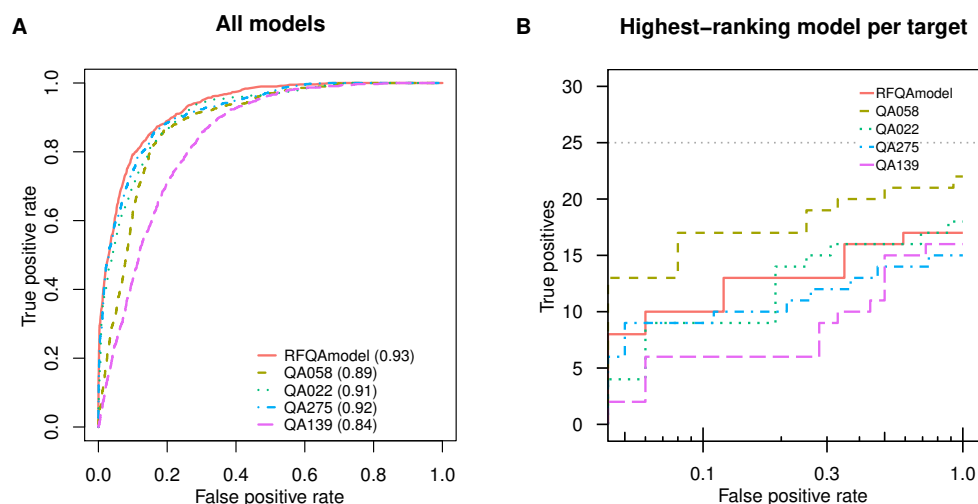

**Fig 5. Classification of CASP13 free-modelling targets.**

Receiver Operating Characteristic (ROC) Curves for the classification of all models into whether they were correct (TM-score  $\geq 0.5$ ) or incorrect according to RFQAmode and four quality assessment scores submitted for the 34 free-modelling targets in the CASP13 set. The area under the ROC curve (AUC) for each method is shown in brackets. B) The number of targets with a correct highest-ranking model (true positives) plotted against the false positive rate on a logarithmic scale. The grey dotted line indicates the total number of targets that had at least one correct model.

## Iterative model generation and quality assessment

The optimal number of models to generate using SAINT2 is 10,000, but RFQAmode may enable us to focus our computational efforts more efficiently by identifying the targets for which fewer models are sufficient to generate good models. It may be possible to improve modelling results by iteratively generating more models for the predicted modelling failures and applying RFQAmode until modelling it predicted to have succeeded with the required confidence.

In order to assess this application, we chose five targets for which RFQAmode predicted the highest-ranking model to be correct with low confidence or modelling failures based on the initial 500 models. We then iteratively generated 10,000 models in intervals of 500 models; at each interval we reassessed the model ensemble and compared the TM-score of the best of the top5 highest-ranking models (Fig 6). As generating and assessing 10,000 models is computationally expensive, carrying out this analysis on all 244 targets in the Validation set is infeasible.

For one target, 2FZPA, no correct models were generated, and RFQAmode classified the highest-ranking model as failed or low confidence for all ensemble sizes.



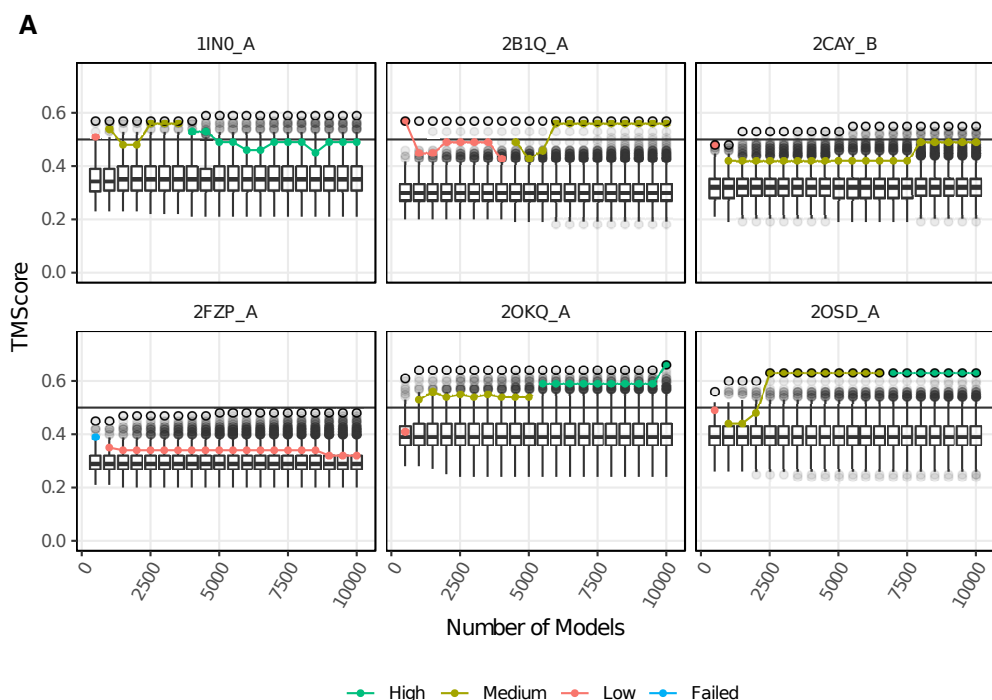

**B**

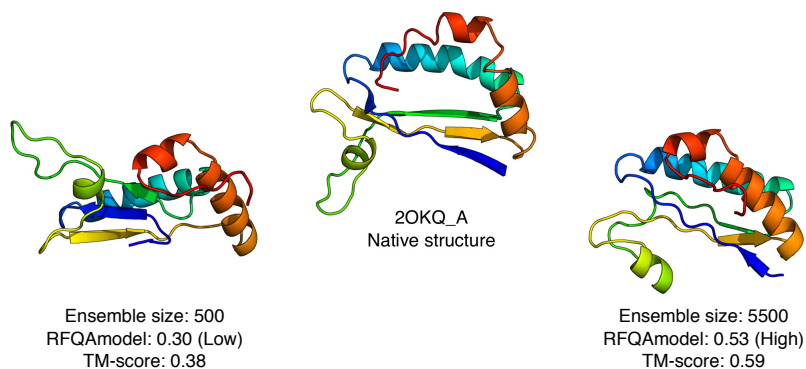

**Fig 6. RFQAmode classification improves with ensemble size.**

A) Six targets that were initially classified by RFQAmode as low confidence or failed were chosen. The TM-scores of the models are shown in boxplots, as the number of models generated for each target is increased in increments of 500 from 500 to 10,000. The best model (highest TM-score) is highlighted with a black circle. The TM-score of the best of the top5 highest-ranking model according to RFQAmode for each ensemble size is indicated with a filled circle, coloured according to the Confidence. B) The native structure of 2OKQA (centre) compared to the highest-ranked model according to RFQAmode after 500 models were generated (left) and after 5,500 models were generated (right), at which point a high confidence RFQAmode score was achieved.

For another target, 2CAYB, the confidence increased from low to medium confidence, 368  
 but a correct model was never identified. For 1IN0A, a high-confidence model was 369  
 identified once the ensemble size reached 4,000, and this model was correct. 370  
 Interestingly, if model generation continues, the quality of the highest-ranking models 371

decreases after 6,000 models. For the remaining three targets, RFQAmode selected 372  
better models with higher confidence as the ensemble size increased (2B1QA, 2OKQA 373  
and 2OSDA). For example, for 2OKQA the highest-ranked model of the initial 500 374  
models had a low-confidence RFQAmode score of 0.3 (TM-score 0.38). After 1,000 375  
models were generated, the highest-ranked model had a medium-confidence score of 0.44 376  
(TM-score 0.53). Once the ensemble size reaches 5,500 the highest-ranked model had a 377  
high-confidence RFQAmode score of 0.53, and a TM-score of 0.59 (Fig 6B). These 378  
results demonstrate how RFQAmode could be used to guide computational efforts and 379  
thus and increase the number of targets for which we have a good predicted structure. 380

## Discussion 381

We show, as have others, that both modelling and quality assessment are more likely to 382  
succeed for targets that are shorter, mostly alpha-helical, or have higher  $B_{\text{eff}}$  values 383  
(e.g. SI Fig 7) [1, 8, 20]. Previous attempts at estimating quality assessment success have 384  
used training and test sets that were not balanced in length and number of effective 385  
sequences (e.g. [12]), which may result in inconsistent performance when applied to 386  
other sets. In order to ensure as accurate an estimate of performance as possible, we 387  
designed our Training and Validation sets to be well-balanced in terms of these features. 388

Using our Training set we built RFQAmode, which uses the contact map alignment 389  
scores EigenTHREADER and map\_align in addition to existing quality assessment 390  
scores to estimate model quality. For targets with sufficient sequence information, we 391  
found that EigenTHREADER identifies correct models for more targets than a number 392  
of existing single-model, consensus, and hybrid model quality scores (Fig 1). Eight of 393  
these targets were not captured by the two other top performing methods, SAINT2 and 394  
PcombC. This indicates that predicted contact map alignment scores are, at least to 395  
some extent, orthogonal to existing model quality assessment scores. 396

Unlike many existing quality assessment scores, RFQAmode was designed to output 397  
a score that indicates the likelihood that a model is correct. On our Validation set it 398  
identifies, with high confidence, a single correct model for 67 of 244 targets with 78% 399  
precision. RFQAmode outperformed the component quality assessment methods, in 400  
agreement with previous studies where combining methods improves 401

performance [4, 12, 21]. When compared to methods used to identify successfully modelled targets in large-scale protein structure prediction studies [10, 12], RFQAmo-  
del achieved a higher recall and was able to identify successfully modelled targets with fewer correct models in their ensemble. This suggests that by using RFQAmo-  
del it may be possible to identify more modelling successes in large-scale studies.

While RFQAmo-  
del was developed and trained using our template-free protein structure prediction protocol, SAINT2, we assessed its suitability for use with other protocols. We tested RFQAmo-  
del on ensembles of models from a large number of different protocols for 56 CASP12 and CASP13 free-modelling targets. RFQAmo-  
del classified the highest-ranking model as correct with high confidence for 38% of targets with 81% precision and 85% recall. While this demonstrates that RFQAmo-  
del can be used to classify models generated by methods other than SAINT2, the performance of RFQAmo-  
del may be improved by training on models from a variety of other protocols.

RFQAmo-  
del was not trained for other quality assessment tasks, such as predicting the absolute quality of models. Furthermore, unlike some methods (including ProQ3D and PCons), RFQAmo-  
del does not estimate the local (per-residue) quality of models. However, we found that it performed comparably to the top-performing methods in CASP13 at selecting a correct model for each target.

Finally, our protocol is able to reduce the computational cost of protein structure prediction, which is a common limitation for large-scale studies. The assignment of confidence enables us to identify the targets for which 500 models are sufficient to generate good models with high confidence. We can then iteratively generate more models for the medium, low confidence, or failed targets and apply RFQAmo-  
del until modelling is predicted to have succeeded with high confidence, focussing computational efforts more efficiently.

## Supporting information

**SI Table 1 Properties of the 8,005 protein chains representing each of the Pfam domains mapped to PDB structures.**

**SI Table 2 Properties of the 4,728 protein chains with SCOPe annotations**

chosen to represent unique Pfam families mapped to PDB structures. 431

SI Table 3 Properties of the 488 protein domains chosen to comprise our 432  
Training and Validation data sets. 433

SI Table 4 RFQAmodel performance for all CASP12 and CASP13 434  
free-modelling and template-based modelling targets. 435

SI Section 1 RFQAmodel Random Seed. 436

SI Section 2 Data sets & culling process. 437

SI Section 3 Number of effective sequences definition. 438

SI Fig 1 SCOP classes of representative chains. 439

SI Fig 2 Domain lengths and resolutions of Training and Validation sets. 440

SI Section 4 Prediction of sequence-based descriptors. 441

SI Section 5 Estimating the number of models required. 442

SI Section 6 Modelling results. 443

SI Fig 7 Modelling success rate by  $B_{\text{eff}}$ , SCOP class, and domain length. 444

SI Fig 8 Modelling success rate by both  $B_{\text{eff}}$  and domain length. 445

SI Fig 9 Ranking of models for Validation set targets. 446

SI Fig 10 The number of targets in our Training set for which the 447  
highest-ranking models are correct according to the three overall best 448  
methods and all methods combined. 449

SI Fig 11 Classification of Validation set targets. 450

SI Fig 12 Confidence categorisation of RFQAmodel scores. 451

## Acknowledgments

452

The authors would like to acknowledge the Oxford Protein Informatics Group and Dr Sebastian Kelm for their intellectual input and comments on the draft.

453

454

## References

1. de Oliveira SHP, Law EC, Shi J, Deane CM. Sequential search leads to faster, more efficient fragment-based de novo protein structure prediction. *Bioinformatics*. 2017;10. doi:10.1093/bioinformatics/btx722.
2. Kryshchak A, Monastyrskyy B, Fidelis K, Schwede T, Tramontano A. Assessment of model accuracy estimations in CASP12. *Proteins Struct Funct Bioinforma*. 2018;86:345–360. doi:10.1002/prot.25371.
3. Moult J, Fidelis K, Kryshchak A, Schwede T, Tramontano A. Critical assessment of methods of protein structure prediction (CASP)—Round XII. *Proteins Struct Funct Bioinforma*. 2018;doi:10.1002/prot.25415.
4. Uziela K, Hurtado DM, Shu N, Wallner B, Elofsson A. ProQ3D: Improved model quality assessments using deep learning. *Bioinformatics*. 2017;33(10):1578–1580. doi:10.1093/bioinformatics/btw819.
5. Andrew Leaver-fay MT, Leaver-Fay A, Tyka M, Lewis SM, Lange OF, Thompson J, et al. ROSETTA3: An Object-Oriented Software Suite for the Simulation and Design of Macromolecules. *Methods Enzymol*. 2011;doi:10.1016/B978-0-12-381270-4.00019-6.
6. Pawlowski M, Kozlowski L, Kloczkowski A. MQAPsingle: A quasi single-model approach for estimation of the quality of individual protein structure models. *Proteins Struct Funct Bioinforma*. 2016;doi:10.1002/prot.24787.
7. Michel M, Skwark MJ, Hurtado DM, Ekeberg M, Elofsson A. Predicting accurate contacts in thousands of Pfam domain families using PconsC3. *Bioinformatics*. 2017;doi:10.1093/bioinformatics/btx332.

8. de Oliveira SHP, Shi J, Deane CM. Comparing co-evolution methods and their application to template-free protein structure prediction. *Bioinformatics*. 2016;33(3):btw618. doi:10.1093/bioinformatics/btw618.
9. Maghrabi AHA, Mcguffin LJ. ModFOLD6: An accurate web server for the global and local quality estimation of 3D protein models. *Nucleic Acids Res*. 2017;45(W1):W416–W421. doi:10.1093/nar/gkx332.
10. Ovchinnikov S, Park H, Varghese N, Huang PS, Pavlopoulos GA, Kim DE, et al. Protein structure determination using metagenome sequence data. *Science* (80- ). 2017;doi:10.1126/science.aah4043.
11. Buchan DWA, Jones DT. EigenTHREADER: analogous protein fold recognition by efficient contact map threading. *Bioinformatics*. 2017;33(17):2684–2690. doi:10.1093/bioinformatics/btx217.
12. Michel M, Menéndez Hurtado D, Uziela K, Elofsson A. Large-scale structure prediction by improved contact predictions and model quality assessment. In: *Bioinformatics*; 2017.
13. Fox NK, Brenner SE, Chandonia JM. SCOPe: Structural Classification of Proteins–extended, integrating SCOP and ASTRAL data and classification of new structures. *Nucleic Acids Res*. 2014;42(Database issue):D304–9. doi:10.1093/nar/gkt1240.
14. Punta M, Coghill PC, Eberhardt RY, Mistry J, Tate J, Boursnell C, et al. The Pfam protein families database. *Nucleic Acids Res*. 2012;40(D1):D290–D301. doi:10.1093/nar/gkr1065.
15. Berman HM, Westbrook J, Feng Z, Gilliland G, Bhat TN, Weissig H, et al. The Protein Data Bank. *Nucleic Acids Res*. 2000;28(1):235–42.
16. Zhang Y, Skolnick J. Scoring function for automated assessment of protein structure template quality. *Proteins Struct Funct Genet*. 2004;57(4):702–710. doi:10.1002/prot.20264.
17. Xu J, Zhang Y. How significant is a protein structure similarity with TM-score = 0.5? *Bioinformatics*. 2010;26(7):889–895. doi:10.1093/bioinformatics/btq066.

18. Wetzelaer GJAH, Kuik M, Olivier Y, Lemaury V, Cornil J, Fabiano S, et al. Asymmetric electron and hole transport in a high-mobility n-type conjugated polymer. *Phys Rev B - Condens Matter Mater Phys.* 2012;86(16):2354–62. doi:10.1103/PhysRevB.86.165203.
19. Cock PJA, Antao T, Chang JT, Chapman BA, Cox CJ, Dalke A, et al. Biopython: Freely available Python tools for computational molecular biology and bioinformatics. *Bioinformatics.* 2009;25(11):1422–1423. doi:10.1093/bioinformatics/btp163.
20. Jones DT, Singh T, Kosciolk T, Tetchner S. MetaPSICOV: Combining coevolution methods for accurate prediction of contacts and long range hydrogen bonding in proteins. *Bioinformatics.* 2015;31(7):999–1006. doi:10.1093/bioinformatics/btu791.
21. Manavalan B, Lee J, Lee J. Random Forest-Based Protein Model Quality Assessment (RFMQA) Using Structural Features and Potential Energy Terms. *PLOS ONE.* 2014;9(9):1–11. doi:10.1371/journal.pone.0106542.
